# Supplementary material
Source: PubMed Central journal article supplement (PMC6980381)
Supplement: NIHMS1065881-supplement-1.pdf [file NIHMS1065881-supplement-1.pdf]

965 **Supplementary Materials:**

966 Figures S1-S18

967 Table S1

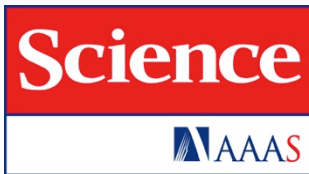

1  
2  
3  
4  
5  
6  
7  
8  
9  
10  
11  
12  
13  
14  
15  
16  
17  
18  
19  
20  
21  
22

## Supplementary Materials for

Substrate processing by the Cdc48 ATPase complex is initiated by ubiquitin unfolding

Edward C. Twomey<sup>1\*</sup>, Zhejian Ji<sup>1\*</sup>, Thomas E. Wales<sup>2</sup>, Nicholas O. Bodnar<sup>1</sup>, Scott B. Ficarro<sup>3,4</sup>, Jarrod A. Marto<sup>3,4</sup>, John R. Engen<sup>2</sup>, and Tom A. Rapoport<sup>1#</sup>

correspondence to: [tom\\_rapoport@hms.harvard.edu](mailto:tom_rapoport@hms.harvard.edu)

### **This PDF file includes:**

Figs. S1 to S18  
Table S1



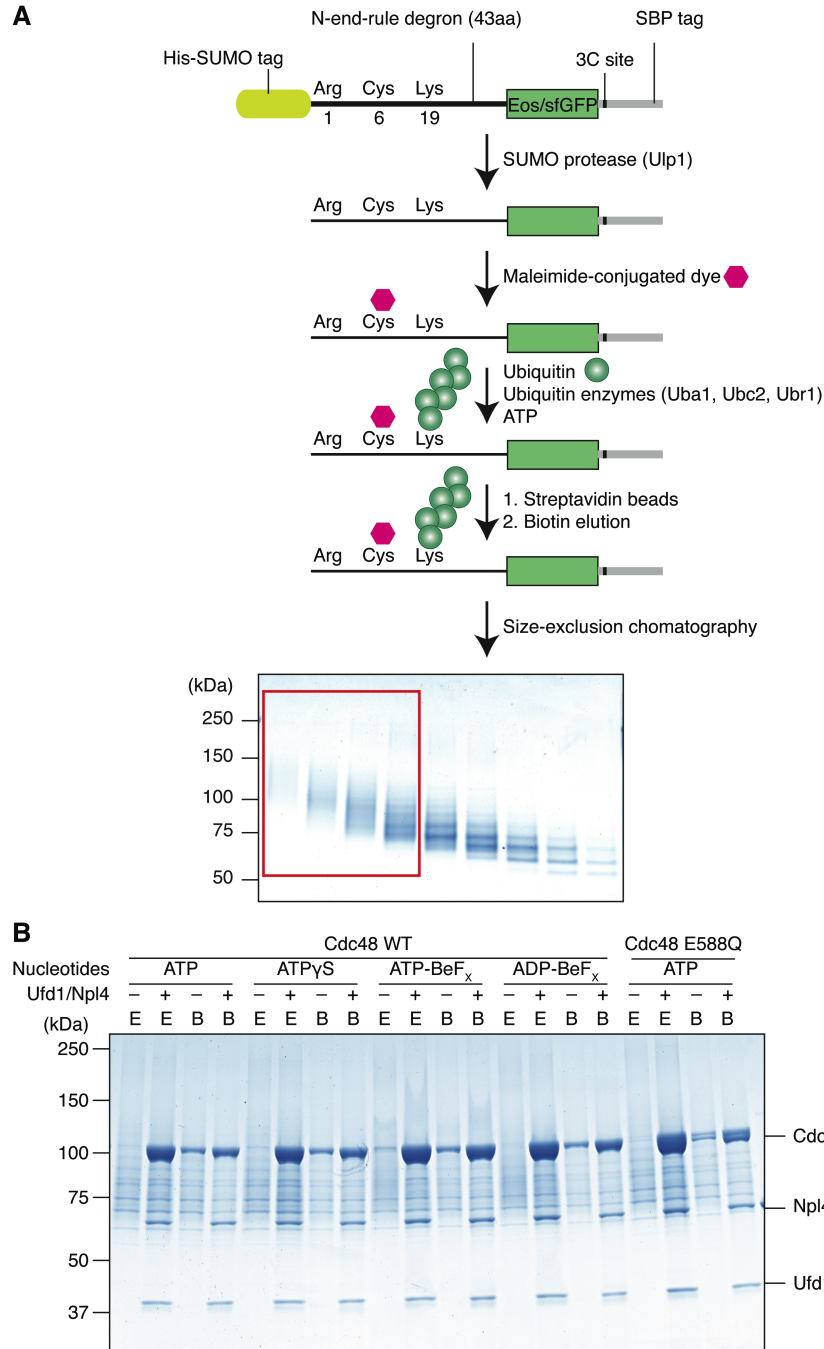

23  
24

25 **Fig. S1. Generation of poly-ubiquitinated substrate and of substrate-engaged Cdc48**  
26 **ATPase complex.**

27 (A) Scheme for the generation of poly-ubiquitinated substrate. The substrate consists of a  
28 His14-SUMO tag, a 43 amino acid degron sequence derived from the *E. coli lac*  
29 repressor, the fluorescent protein Eos or sfGFP, a 3C-cleavage site, and a streptavidin  
30 binding peptide (SBP) tag. The protein was purified on the basis of the N-terminal His14-  
31 tag, and the SUMO tag was then cleaved off with SUMO protease (Ulp1). In some  
32 experiments, a fluorescent dye was attached to Cys6. The protein was incubated with a

33 mixture of ubiquitin-activating enzyme (Uba1), ubiquitin-conjugating enzyme (Ubc2),  
34 ubiquitin ligase (Ubr1), ubiquitin, and ATP. The poly-ubiquitinated substrate was  
35 purified on streptavidin beads via its C-terminal SBP tag, eluted from the resin with  
36 biotin, and subjected to size-exclusion chromatography. Fractions were analyzed by SDS-  
37 PAGE and Coomassie blue staining. The fractions indicated with a red box were pooled  
38 and used to generate the substrate-engaged Cdc48 complex. **(B)** Substrate generated as in  
39 **(A)** was bound to streptavidin beads, incubated with or without Ufd1/Npl4 complex, and  
40 then with Cdc48 in the presence of the indicated nucleotides. Biotin was added and the  
41 eluted (E) and bound (B) fractions were analyzed by SDS-PAGE and Coomassie blue  
42 staining.

43

44

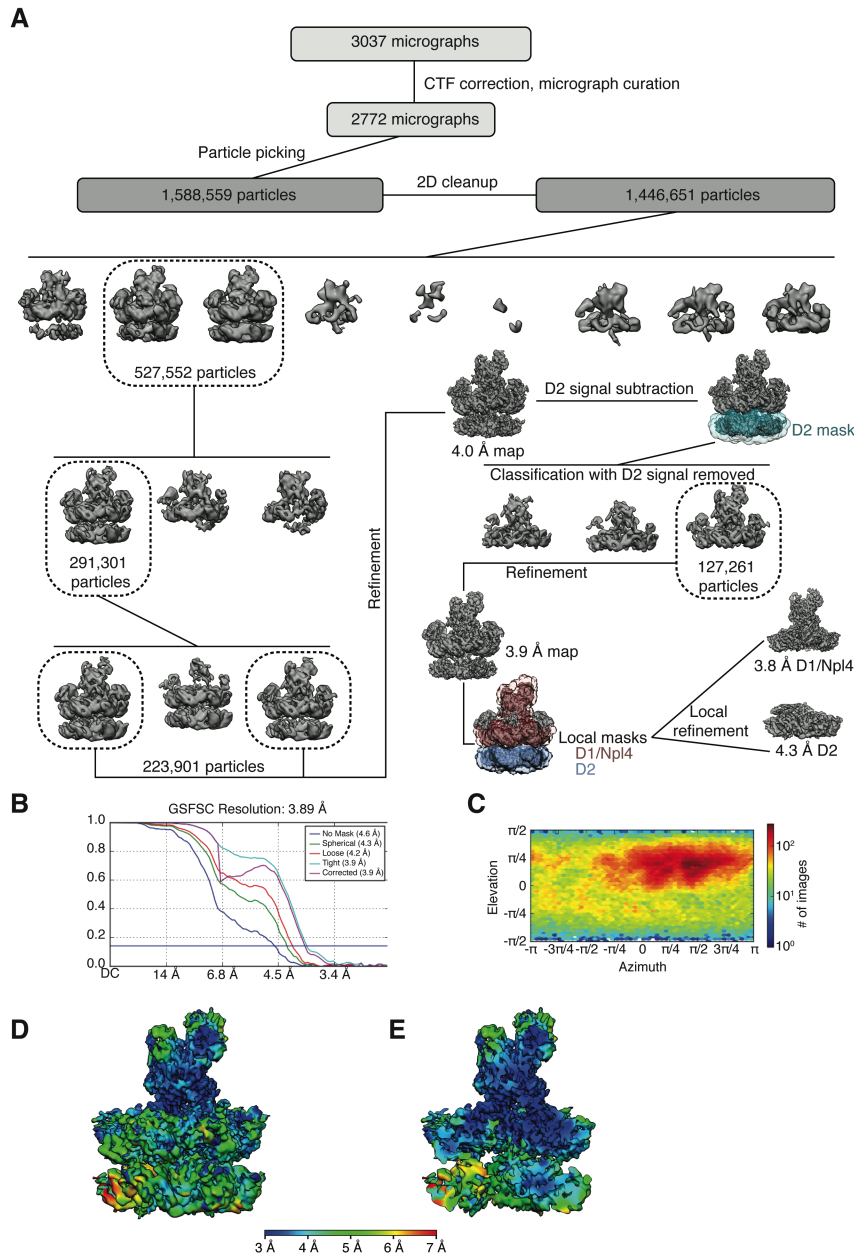

45

46 **Fig. S2. Cryo-EM analysis of the substrate-engaged Cdc48 complex in ATP.**

47 (A) Image processing workflow for 3D classification and refinement. Shown are side  
48 views of 3D reconstructions, with the number of particles used for further analysis  
49 indicated. (B) Gold-standard Fourier shell correlation (GSFSC) was calculated during  
50 refinement with different masks in Cryosparc2. The resolutions were determined at  
51 FSC=0.143. The final corrected mask gave an overall resolution of 3.9Å. (C) Direction  
52 distribution over azimuth and elevation angles of particles used in CryoSPARC  
53 refinement; (0,0) is a side view. (D) Side view of the map, with local resolution  
54 calculated from the unfiltered half-maps, colored according to the scale. (E) As in (D),  
55 but the density was cut to the central ATPase pore.

56

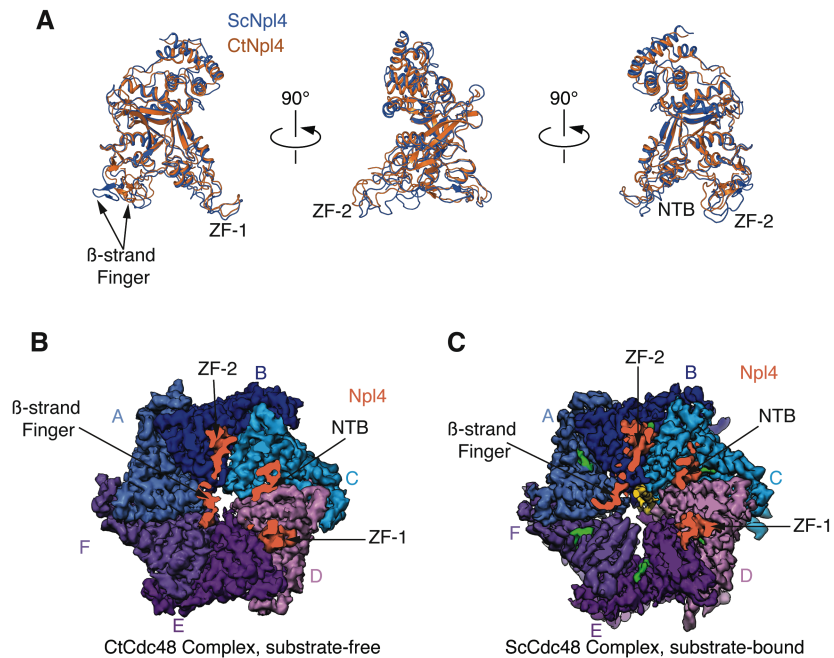

57  
58

59 **Fig. S3. Comparison of the *S. cerevisiae* and *C. thermophilum* Npl4 towers and their**  
60 **interaction with Cdc48.**

61 (A) Three different side views of the superimposed models of the Npl4 towers of the  
62 substrate-engaged *S. cerevisiae* (Sc; blue) Cdc48 complex and substrate-free *C.*  
63 *thermophilum* Cdc48 complex (Ct; orange; PDB code 6CDD). The models are shown in  
64 ribbon representation. The b-strand finger,  $Zn^{2+}$ -fingers 1 and 2 (ZF-1 and ZF-2), and N-  
65 terminal bundle (NTB) are indicated. (B) Top view of the density map of the *C.*  
66 *thermophilum* Cdc48 complex lacking substrate, cut close to the surface of the D1 ring.  
67 Density for the Npl4 tower is shown in orange. (C) As in (B), but for the substrate-  
68 engaged *S. cerevisiae* complex. Note that the b-strand finger has moved outwards from  
69 the pore.

70  
71

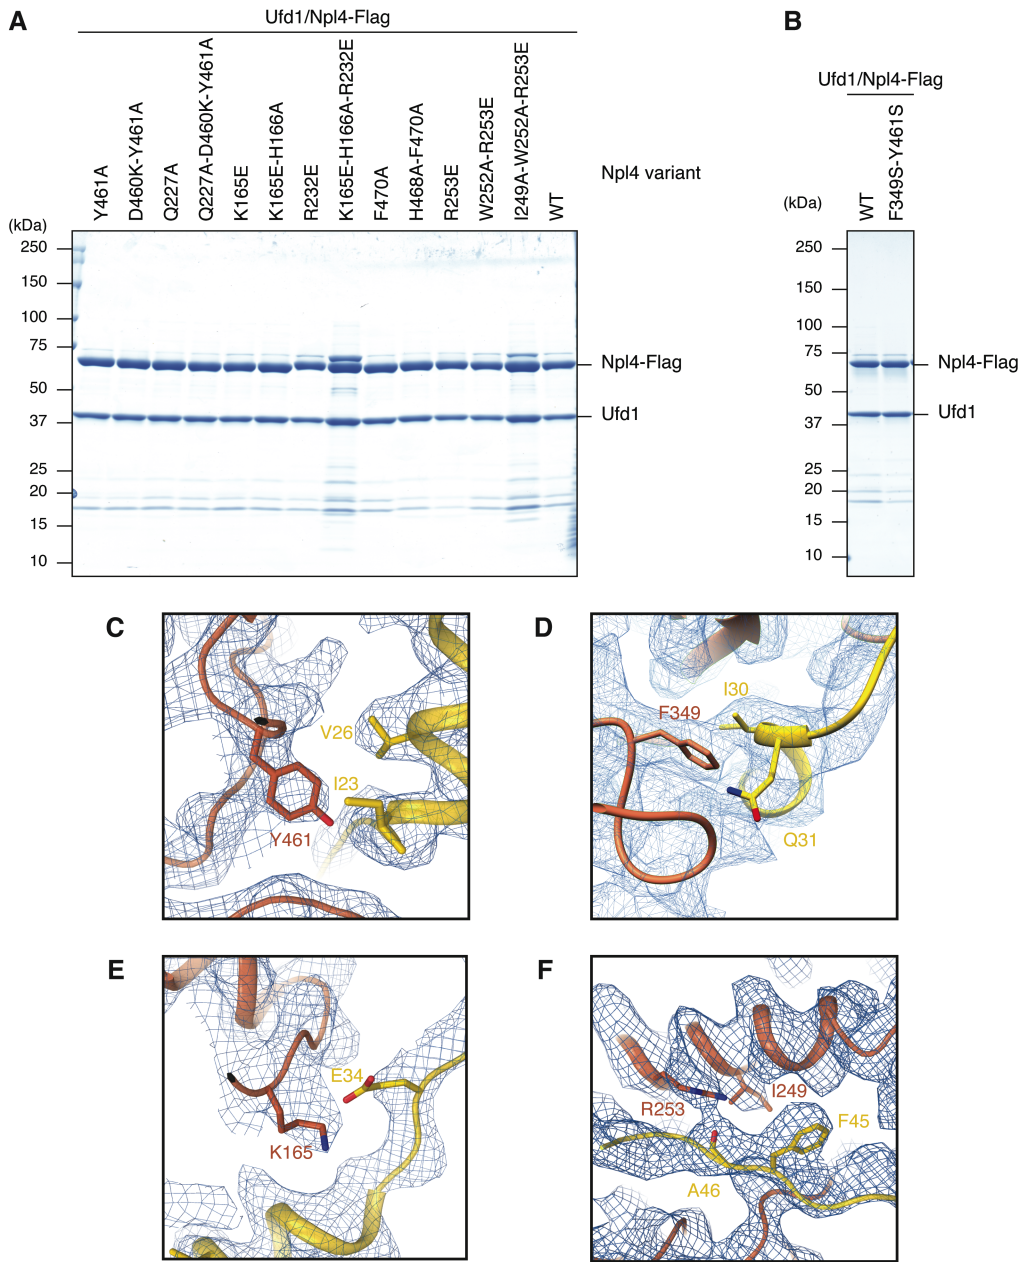

72

73 **Fig. S4. Interaction of Npl4 mutants with Ufd1 and of Npl4 groove residues with**  
 74 **unUb.**

75 (A-B) Mutation of the Npl4 groove does not affect the interaction between Npl4 and  
 76 Ufd1. Wild-type Npl4 or the indicated Npl4 mutants, all carrying FLAG-tags at the C-  
 77 terminus, were co-expressed with His-SUMO Ufd1 in *E. coli*. The proteins were purified  
 78 on the basis of the His-tag on Ufd1 and the tag was removed with SUMO-protease. The  
 79 samples were analyzed by SDS-PAGE and Coomassie blue staining. (C) The conserved  
 80 Y461 residue of Npl4 (orange) interacts with V26 and I23 of unUb (yellow). The models  
 81 are shown in ribbon representation and the density as a blue mesh. (D) As in (C), but  
 82 showing the interaction of F349 with I30 and Q31. (E) As in (C), but showing interaction

83 between K165 and E34. **(F)** As in **(C)**, but showing interaction of R253 with the  
84 backbone of A46 and of I249 with F45.  
85  
86

Cdc48/UN/Substrate with ADP-BeFx  
- Cdc48/UN with ADP-BeFx

UN/Substrate - UN

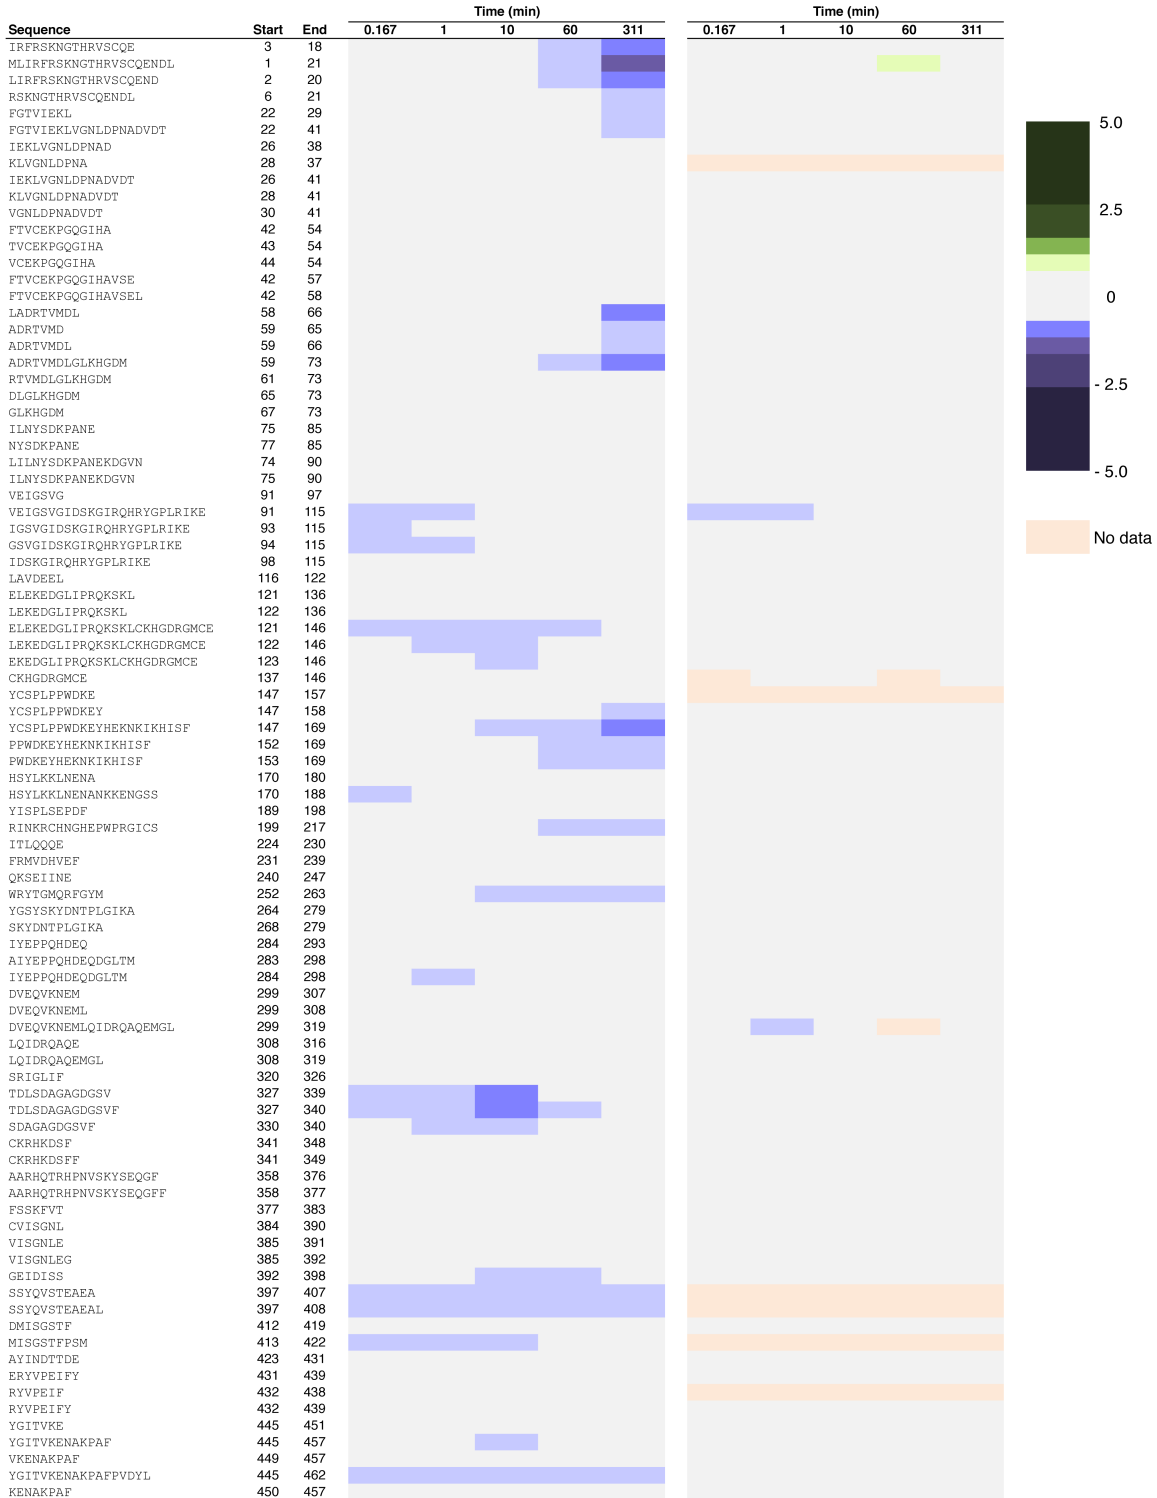

87  
88

(Continued on next page)

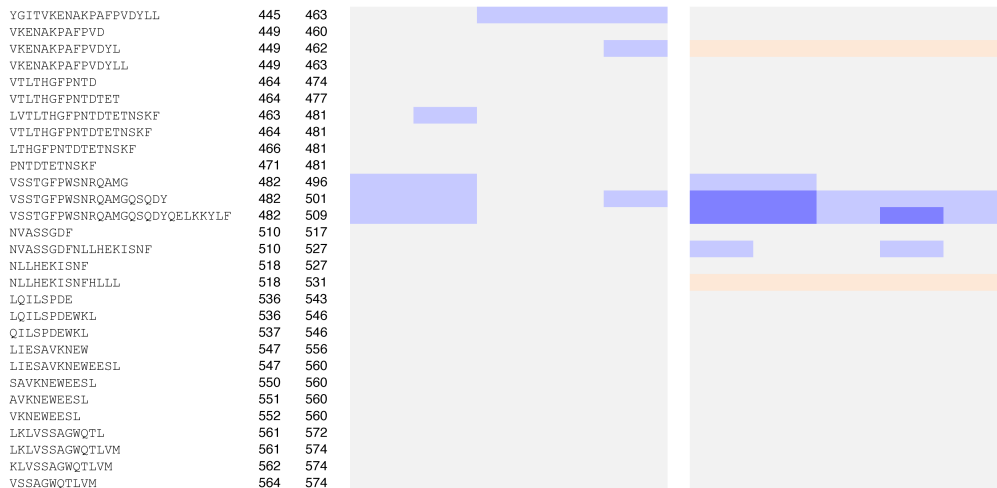

89  
90

91 **Fig. S5. Substrate protection of Npl4 from HDX in the absence or presence of**  
92 **Cdc48.**

93 HDX was performed with Cdc48/UN complex and ADP/BeF<sub>x</sub> (left) or with UN alone  
94 (right), in the absence or presence of substrate. The HDX reaction was quenched at  
95 different time points, the protein was digested with pepsin and the peptides analyzed by  
96 MS. Shown is the difference in HDX (with/without substrate) for peptides of Npl4.  
97 Shown is the mean of two experiments. The peptides are listed from the N- to the C-  
98 terminus, with their first and last residue indicated. The degree of HDX protection by  
99 substrate is shown in shades of blue (protection) and green (de-protection) (in Daltons,  
100 scale on the right).

101  
102



Cdc48/UN/Substrate with ADP-BeFx -  
Cdc48/UN with ADP-BeFx

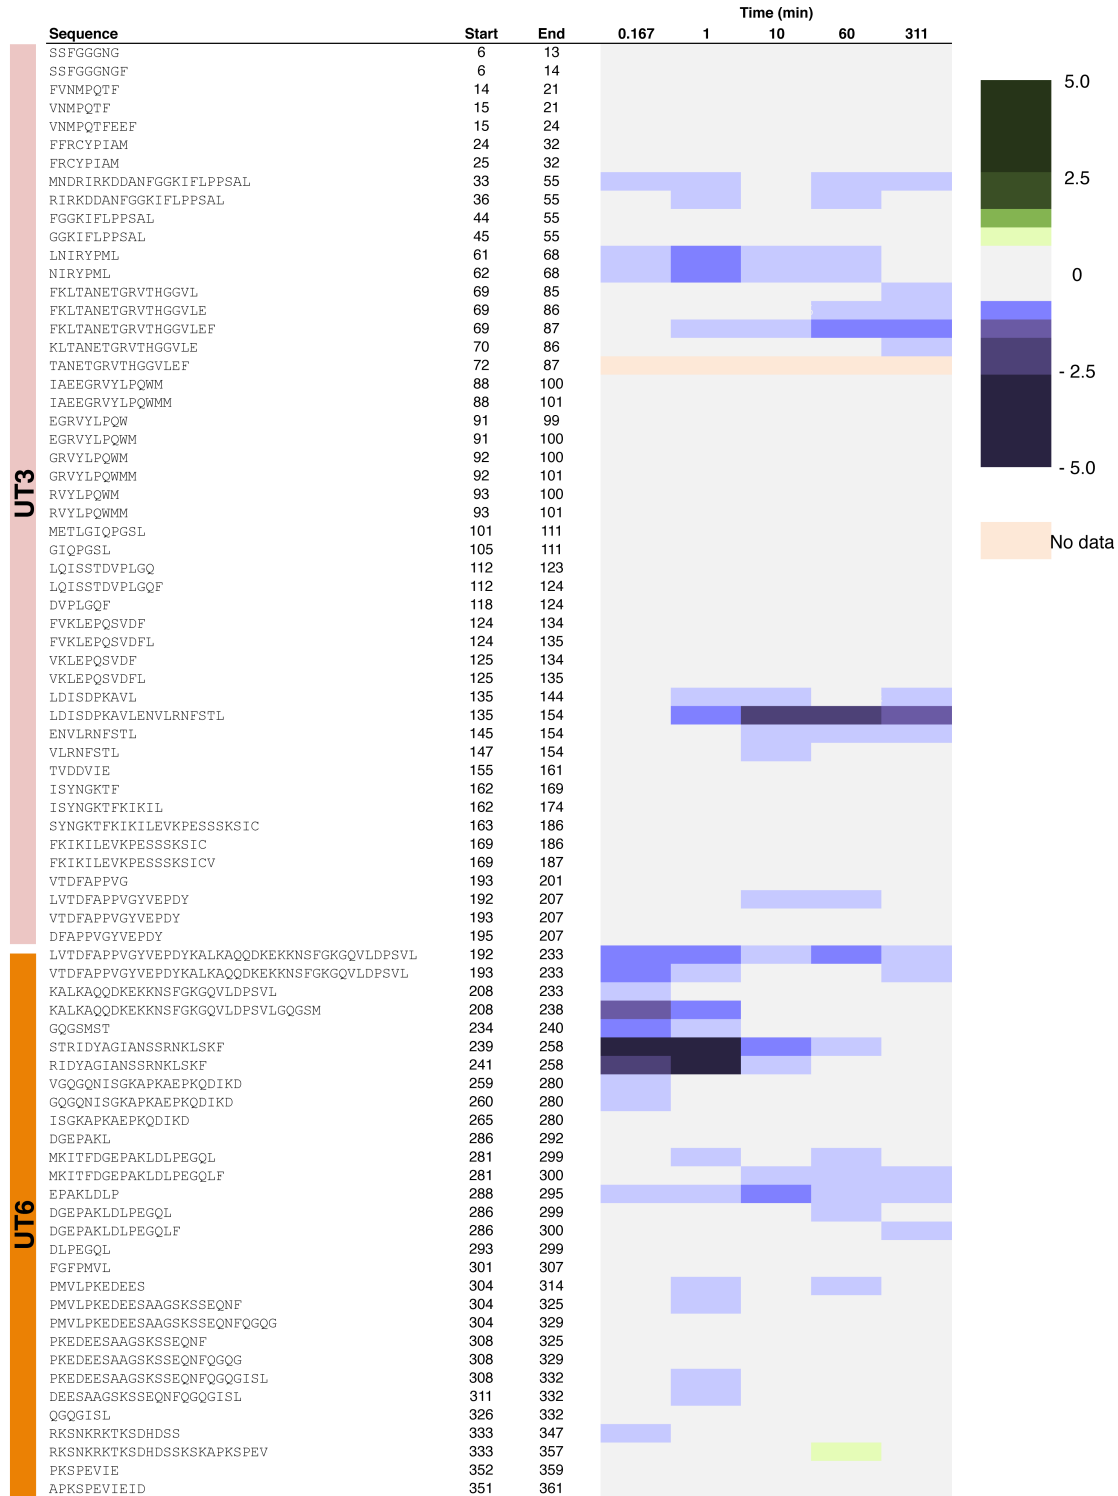

103  
104

105 **Fig. S6. Substrate protection from HDX determined for Ufd1 in the Cdc48/UN**  
106 **complex.**

107 HDX was performed with a Cdc48/UN complex and ADP/BeF<sub>x</sub> in the absence or  
108 presence of substrate. The HDX reaction was quenched at different time points, the  
109 protein was digested with pepsin and the peptides analyzed by MS. Shown is the  
110 difference in HDX (with/without substrate) for peptides of Ufd1. Shown is the mean of  
111 two experiments. The peptides are listed from the N- to the C-terminus, with their first  
112 and last residue indicated. The degree of HDX protection by substrate is shown in shades  
113 of blue (protection) and green (de-protection) (in Daltons, scale on the right). Peptides  
114 belonging to the UT3 and UT6 domains of Ufd1 are indicated by the bars on the left.

115  
116

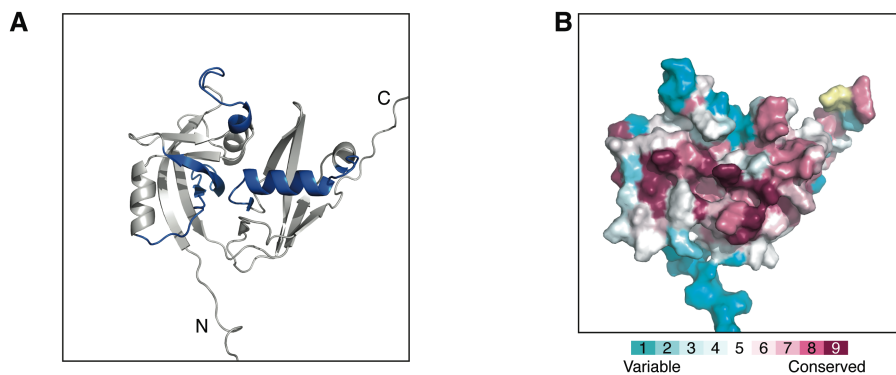

117  
118

119 **Fig. S7. Substrate binding to the UT3 domain of Ufd1 analyzed by HDX MS.**

120 (A) HDX MS was performed with Cdc48/UN/ADP/BeF<sub>x</sub> in the absence or presence of  
 121 poly-ubiquitinated substrate at different time points (**fig. S6**). Substrate-protected regions  
 122 in the UT3 domain are shown in blue in a ribbon representation of its NMR structure  
 123 (PDB code: 1ZC1). (B) Surface model of UT3 viewed as in (A). Residues are colored  
 124 according to the degree of their conservation. Regions in yellow had insufficient  
 125 sequences for calculation of their conservation (less than 10%). The conservation map  
 126 was generated by the ConSurf Server.

127  
128

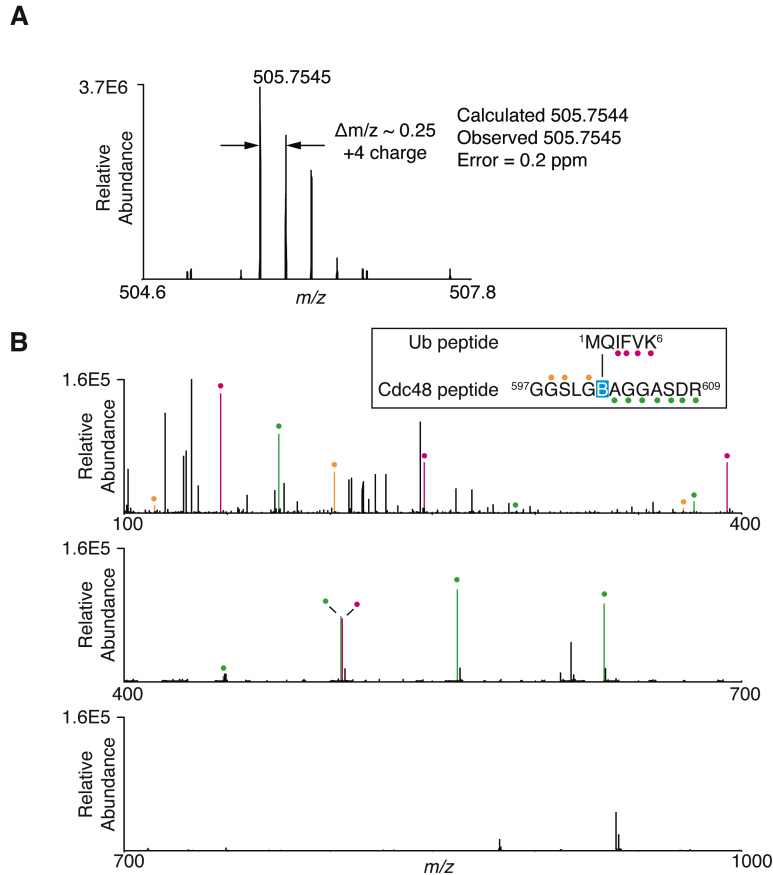

129  
130

131 **Fig. S8. Identification of photo-crosslinks between Cdc48 and ubiquitin by mass**  
132 **spectrometry.**

133 **(A)** Cdc48-FLAG containing benzoylphenylalanine (Bpa) at position 602 was incubated  
134 with UN and dye-labeled, poly-ubiquitinated sfGFP in the presence of ADP. The sample  
135 was irradiated, and Cdc48-FLAG and crosslinked products were isolated with FLAG-  
136 antibody beads. Nano LC-MS/MS analysis of tryptic digests resulted in detection of a  
137 quadruply charged precursor ion at  $m/z$  505.7545 consistent with the mass of  
138  $^{597}\text{GGSLG}(\text{Bpa})\text{AGGASDR}^{609}$  (Cdc48) crosslinked to  $^1\text{MQIFVK}^6$  (ubiquitin). **(B)**  
139 MS/MS spectrum of the crosslinked peptide precursor described in **(A)**. Cdc48 derived  
140 ions of type b and y are marked with yellow and green glyphs, respectively, while y-type  
141 ions derived from ubiquitin are marked with magenta glyphs. B, Bpa.

142  
143

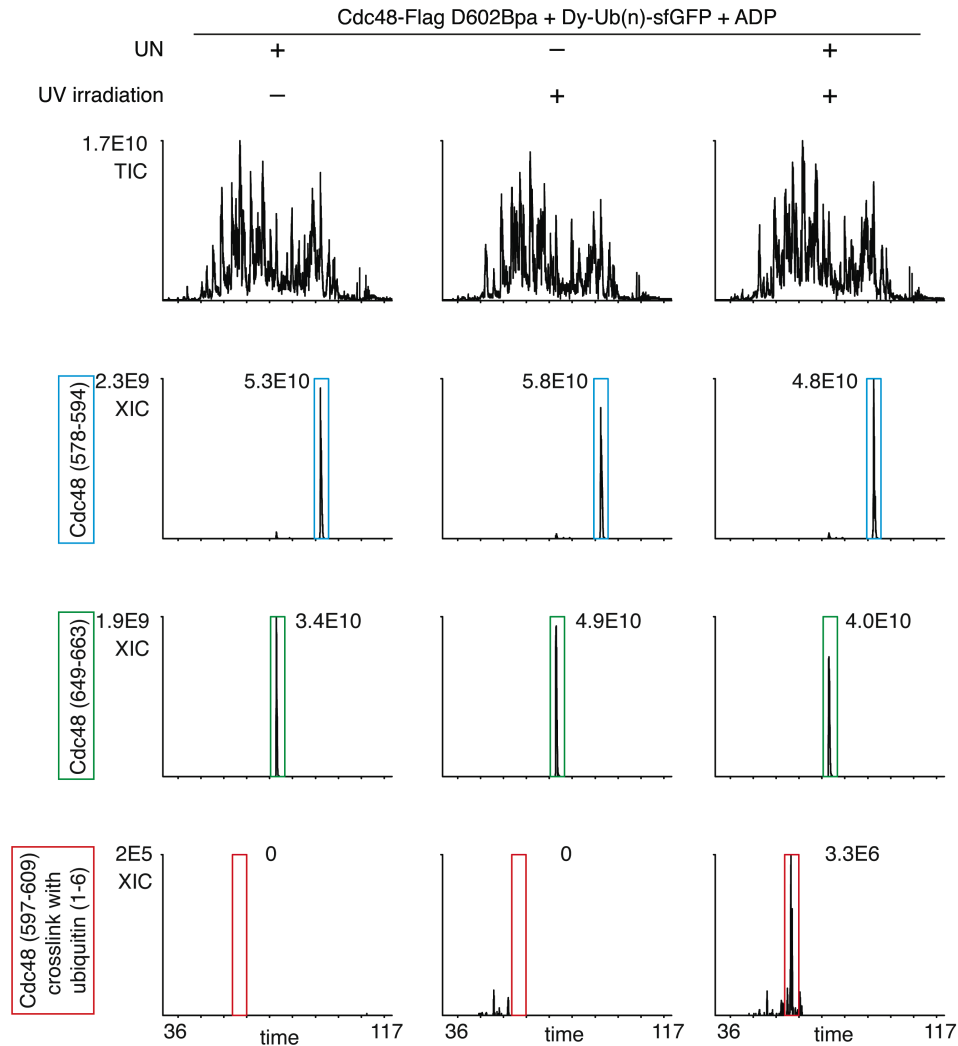

144  
145

146 **Fig. S9. Crosslinking between Cdc48 and ubiquitin is dependent on the presence of**  
147 **UN and irradiation.**

148 Total ion chromatograms (TICs) and extracted ion chromatograms (XICs) obtained  
149 during nano-LC-MS/MS of tryptic digests of crosslinking reactions. Crosslinking was  
150 performed as described in **fig. S8**. Reaction 1 (left column) was not irradiated, reaction 2  
151 (middle column) was performed without UN, and reaction 3 (right column) was  
152 irradiated in the presence of UN. Reference peptides from Cdc48 (residues 578-594, blue  
153 rectangle; residues 649-663, green rectangle) were detected at similar levels in each  
154 reaction, while the peptide <sup>597</sup>GGSLG(Bpa)AGGASDR<sup>609</sup> (Cdc48) crosslinked to  
155 <sup>1</sup>MQIFVK<sup>6</sup> (ubiquitin) was detected only after UV irradiation and in the presence of UN  
156 (reaction 3, right column, red rectangle). The peak area for each peptide is indicated  
157 within each XIC.

158  
159

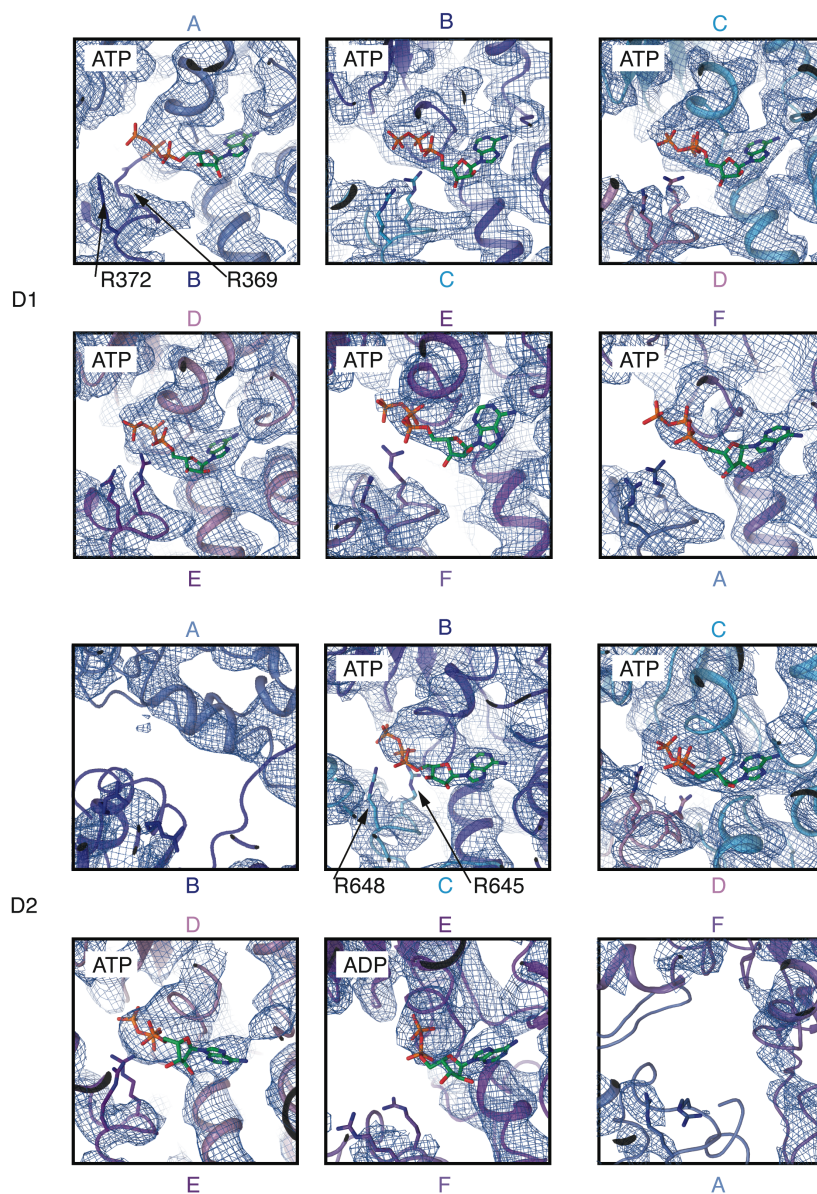

160  
161

162 **Fig. S10. Nucleotides bound to the substrate-engaged Cdc48 complex prepared in**  
163 **ATP.**

164 Nucleotide binding pockets of the ATPase subunits in the D1 and D2 rings. Density for  
165 the nucleotide and neighboring protein segments are shown as a blue mesh. Models for  
166 protein are shown in ribbon representation and the nucleotides as stick models. Arg  
167 residues contacting the nucleotide from the neighboring ATPase subunits are indicated.  
168 The assignment of ADP or ATP is based on comparing nucleotide densities and the  
169 presence or absence of an Arg finger of the neighboring subunit in its vicinity. In the D2  
170 ring, the nucleotide binding pockets of subunits A and F are wide open. These subunits  
171 are probably in the nucleotide-free state.

172  
173

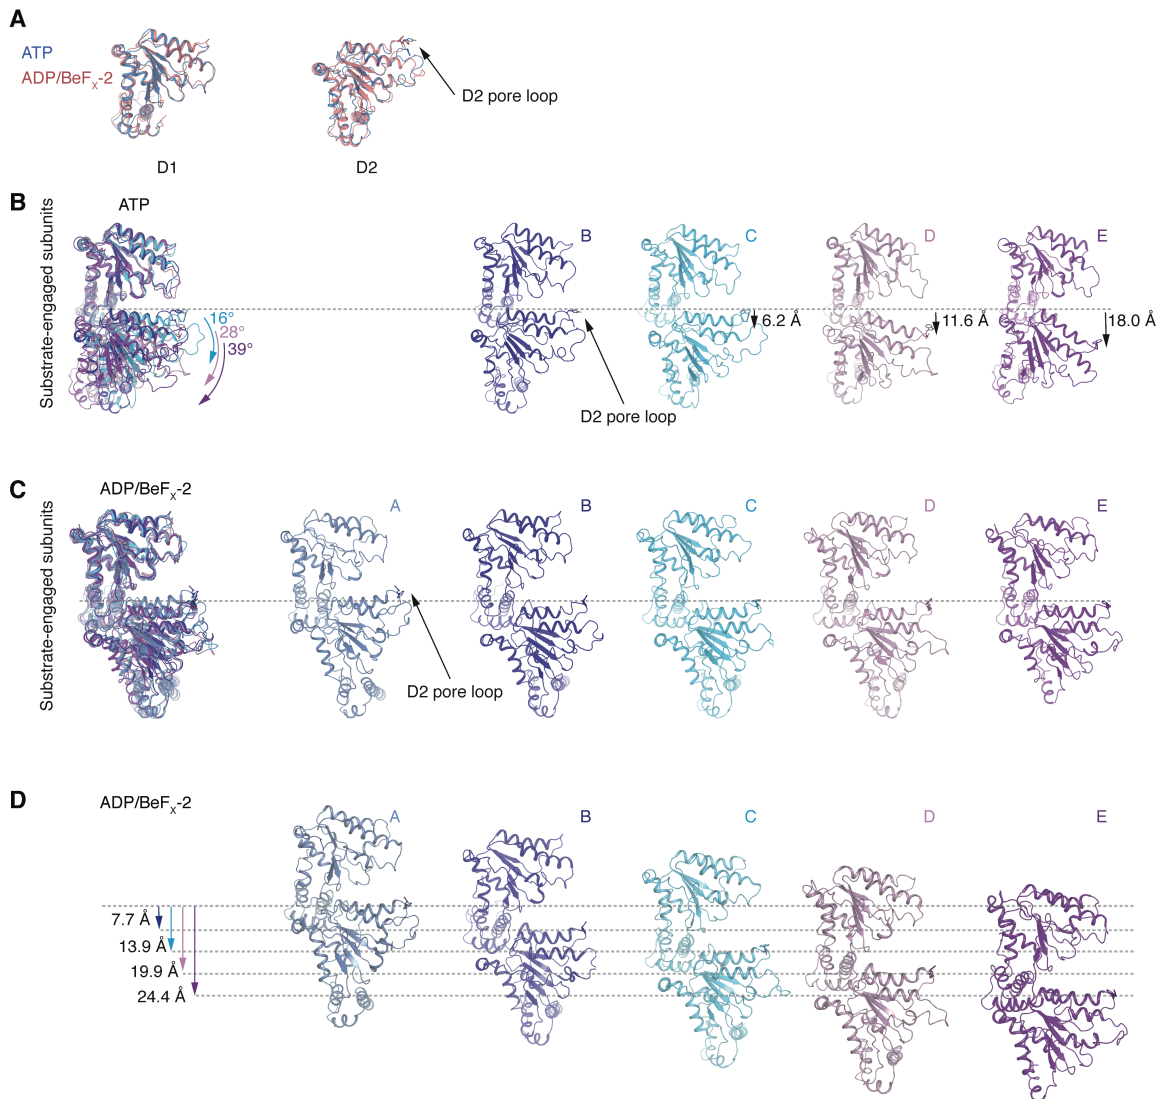

174  
175

176 **Fig. S11. The D1 and D2 domains of the Cdc48 monomers behave as rigid bodies.**  
 177 **(A)** Superposition of D1 and D2 domains from ATP and ADP/ BeF<sub>x</sub> -2 structures. **(B)**  
 178 The substrate-engaged Cdc48 monomers from the ATP structure were superimposed  
 179 using the D1 domains as reference. The D2 domains of monomers B-E move as rigid  
 180 bodies. The angles and distances of the D2 pore loop changes are indicated. **(C)** As in  
 181 **(B)**, but for the ADP/BeF<sub>x</sub>-2 structure. Note that the relative positions of the D1 and D2  
 182 domains remains unchanged among the monomers. **(D)** Changes of the substrate engaged  
 183 monomers A-E in the ADP/BeF<sub>x</sub>-2 structure. D1 and D2 move together the indicated  
 184 distances.

185  
186



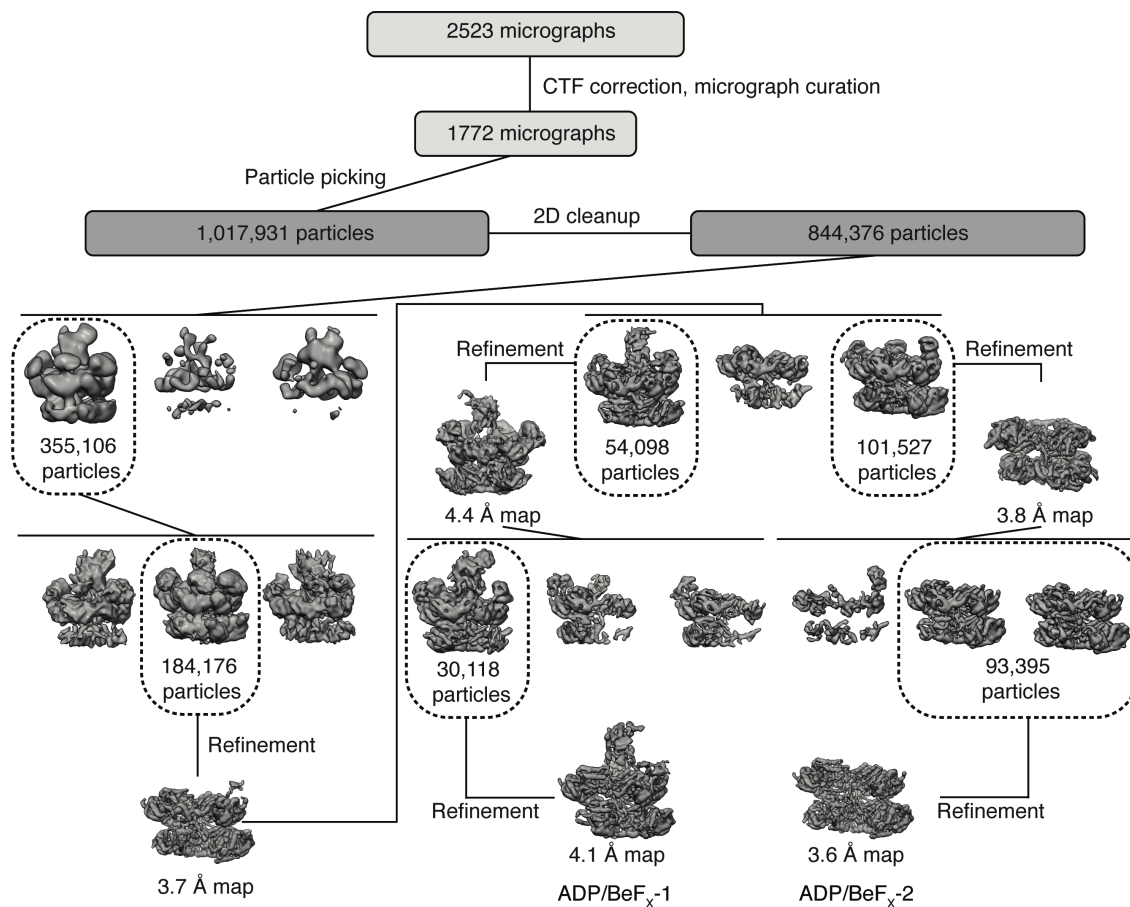

187  
188

189 **Fig. S12. Cryo-EM analysis of the substrate-engaged Cdc48 complex in ADP/BeF<sub>x</sub>.**

190 Image processing workflow for 3D classification and refinement. Shown are side views  
 191 of 3D reconstructions, with the number of the particles used for further analysis  
 192 indicated. The two best classes (ADP/BeF<sub>x</sub>-1 and ADP/BeF<sub>x</sub>-2) had final overall  
 193 resolutions of 4.1 Å and 3.7 Å, respectively.

194  
195



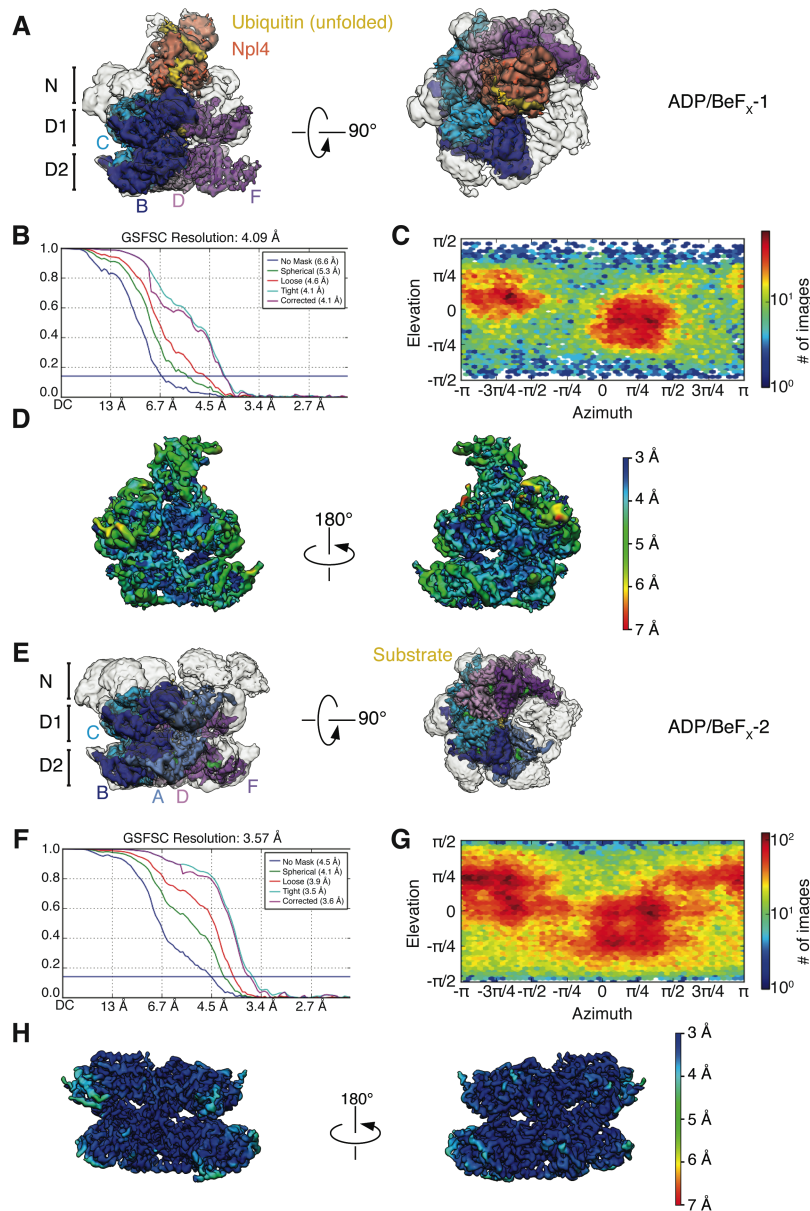

196  
197

198 **Fig. S13. Refined cryo-EM maps of the substrate-engaged Cdc48 complex in**  
199 **ADP/BeF<sub>x</sub>.**

200 (A) Cryo-EM map of the 3D class ADP/BeF<sub>x</sub>-1 in two different views. The domains of  
201 Cdc48, cofactor, and ubiquitin molecules attached to substrate are shown in different  
202 colors. The subunits in the hexameric ATPase ring are labeled. The refined, unsharpened  
203 map is shown in transparent grey over the final map sharpened with a B-factor of -150.  
204 (B) Gold-standard Fourier shell correlation (GSFSC) calculated during refinement with  
205 different masks in Cryosparc2. The resolutions were determined at FSC=0.143. The final  
206 corrected mask gave an overall resolution of 3.9 Å. (C) Direction distribution over  
207 azimuth and elevation angles of particles used in CryoSPARC refinement; (0,0) is a side  
208 view. (D) Local resolution was calculated from the unfiltered half-map and colored

209 according to the scale on the side. **(E)-(H)** As in **(A)-(D)**, but for the 3D class ADP/BeF<sub>x</sub>-  
210 2. The ADP/BeF<sub>x</sub>-2 map was sharpened with a B-factor of -100. The final corrected mask  
211 gave an overall resolution of 3.6Å.  
212  
213

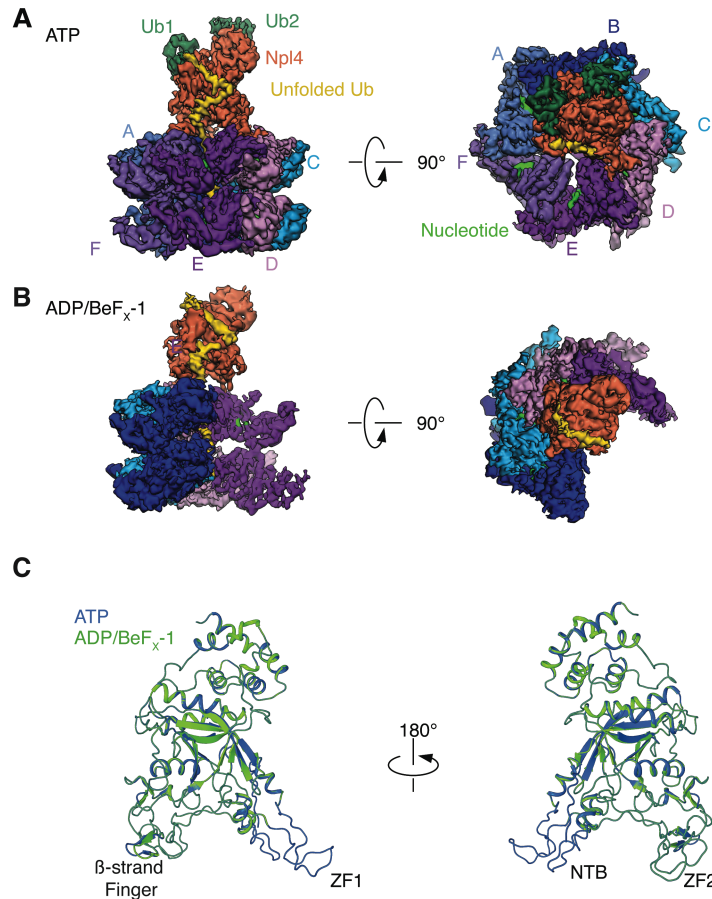

214  
215

216 **Fig. S14. Comparison of the Npl4 towers in the ATP and ADP/BeF<sub>x</sub>-1 structures.**  
 217 (A) Side and top views of a sharpened map (B-factor = -150) of the substrate-engaged  
 218 Cdc48 complex in ATP. (B) As in (A), but for the ADP/BeF<sub>x</sub>-1 map. (C) Ribbon diagram  
 219 models for the Npl4 tower in the ATP (blue) and ADP/BeF<sub>x</sub>-1 (green) structures. Note  
 220 that no density for Zn<sup>2+</sup>-finger 1 (ZF-1) and the N-terminal bundle (NTB) were seen in  
 221 the ADP/BeF<sub>x</sub>-1 map, likely because these domains are not associated with Cdc48.

222  
223

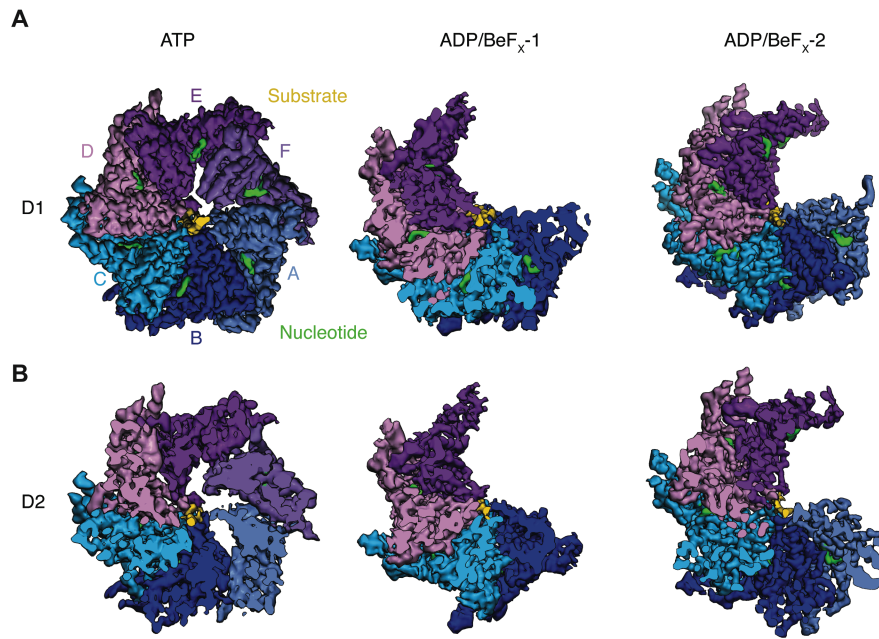

224  
225

226 **Fig. S15. Comparison of the maps for the D1 and D2 ATPase rings in the three cryo-**  
227 **EM reconstructions.**

228 (A) Top view of the density maps of the ATP, ADP/BeF<sub>x</sub>-1, and ADP/BeF<sub>x</sub>-2 structures,  
229 cut to the surface of the D1 ring. Substrate density is shown in yellow. The D1 ATPases  
230 are colored individually and labeled A-F. Density for bound nucleotides is shown in  
231 green. (B) As in (A), but cut to the surface of the D2 ring. Note that the gaps in the D1  
232 and D2 rings of the ADP/BeF<sub>x</sub>-1, and ADP/BeF<sub>x</sub>-2 structures, corresponding to flexible  
233 ATPase subunits, are at the same positions.

234  
235

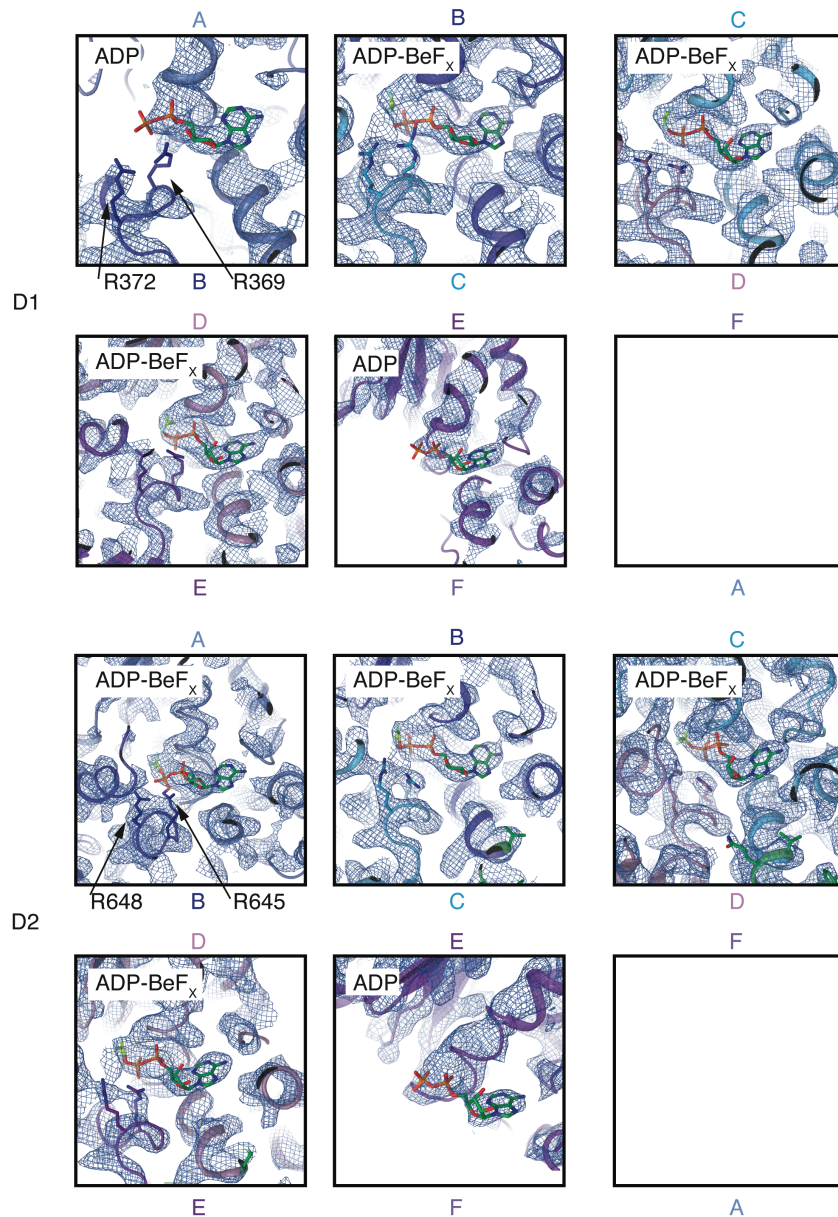

236  
237

238 **Fig. S16. Nucleotides bound in the ADP/BeF<sub>x</sub>-2 structure.**

239 Nucleotide binding pockets of the ATPase subunits in the D1 and D2 rings. Density for  
 240 ADP/BeF<sub>x</sub> and neighboring protein segments are shown as a blue mesh. Models for  
 241 protein are shown in ribbon representation and the nucleotides as stick models. Arg  
 242 residues contacting the nucleotide from the neighboring ATPase subunits are indicated.  
 243 The assignment of ADP or ADP-BeF<sub>x</sub> is based on comparing nucleotide densities and  
 244 the presence or absence of an Arg finger of the neighboring subunit in its vicinity.  
 245 Density for subunits F of both rings is weak and therefore not shown. These subunits are  
 246 probably in the nucleotide-free state.  
 247







D1

KAIGKPPRGVL 241 252  
 AIGKPPRGVL 242 252  
 IGKPPRGV 243 251  
 IGKPPRGVL 243 252  
 IGKPPRGVLM 243 253  
 GIKPPRGVL 244 252  
 MYGPPGKRLM 253 264  
 YGPPGKRTL 254 263  
 MYGPPGKRLMA 253 265  
 YGPPGKRTLM 254 264  
 YGPPGKRLMA 254 265  
 MSAVANETGAF 264 275  
 SRAVANETGAF 265 275  
 RAVANETGAF 266 275  
 VANETGAF 268 275  
 FLINQFEM 276 285  
 LINGFEM 278 285  
 SFMAGESENL 286 296  
 SFMAGESENLHAFEAERKHADAI 286 310  
 SFMAGESENLHAFEAERKHAFIIF 286 312  
 HAFEA 297 303  
 EAKENAFIIF 302 312  
 AENAFIIF 303 312  
 IDEIDSIAPERDETHEVE 313 331  
 IDSIAFRDETHEVE 316 329  
 SIAFRDETHEVE 316 331  
 DEIDSIAFRDETHEVEVRRVVSQ 314 338  
 IDSIAFRDETHEVEVRRVVSQ 316 338  
 SIAFRDETHEVEVRRVVSQ 318 338  
 REVVGL 332 338  
 LTIMQMSA 339 347  
 LTIMQMSRNV 339 351  
 MQMSRNV 342 349  
 LTIMQMSRNVVV 339 353  
 MQMSRNV 342 351  
 QMSRNV 343 351  
 MSRNV 344 351  
 MEARSNV 345 351  
 LTIMQMSRNVVVIATNRPNISIDPALRFQRF 339 373  
 VVIATNRPNISID 351 364  
 VVIATNRPNISID 352 364  
 VVIATNRPNISIDPAL 352 367  
 AATNRPNISID 355 364  
 AATNRPNISIDPAL 354 367  
 ATRPNISIDPAL 356 367  
 VVIATNRPNISIDPALRFQRF 352 373  
 PALRFQRF 355 373  
 DREVIGIPDATGRLEV 374 390  
 VDIGIPDATGR 377 398  
 IGIPDATGR 379 388  
 IGIPDATGRLEV 379 390  
 PDATGRLEV 382 390  
 EVLHFTNMRLAD 389 402  
 LHFTNMRL 391 400  
 RHFTNMRL 392 400  
 LHFTNMRLAD 391 402  
 RHFTNMRLAD 392 402  
 RHFTNMRLADDD 392 403  
 LHFTNMRLADDD 391 406  
 LHFTNMRLADDDVL 391 406  
 TSMRLAD 395 402  
 RHFTNMRLADDDVL 392 406  
 AATHGY 410 418  
 BALAAATHGYVGD 407 420  
 ALAATHGYVGD 408 420  
 LAATHGYVGD 409 420  
 AATHGYVGD 410 420  
 ETHGYVGD 412 420  
 AMQQLREEMDL 428 435  
 CSEAMQQLREEMDL 425 439  
 AMQQLREEMDL 428 439  
 AQQLREEMDL 429 439  
 TREMGL 433 439  
 DEBIDA 443 449  
 DEBIDAE 443 450  
 DSGVTM 453 459  
 DSGVTMD 453 460  
 DSGVTMDN 453 461  
 DSGVTMDF 453 462  
 QVTMDF 456 462  
 NFFALGNPFAL 461 474  
 FFALGNPFAL 462 474  
 FFALGNPFA 463 473  
 FFALGNPFAL 463 474  
 FFALGNPFALRE 462 476  
 RETVVSVN 475 483  
 TVVSVN 477 483  
 SVNVTWDDVGL 481 492  
 SVNVTWDDVGLD 481 493  
 SVNVTWDDVGLDE 481 494  
 VNVTWDDVGLDE 482 494  
 VTWDDVGL 484 492  
 VTWDDVGLD 484 493  
 TWDDVGL 485 492  
 VTWDDVGLLE 484 494  
 DDVGLLE 487 494  
 SVNVTWDDVGLDEIKEKLE 481 501  
 SVNVTWDDVGLDEIKEKLETVY 481 505  
 DEKLE 493 499  
 IREKLE 494 501  
 IREKLE 495 501  
 EKLETVY 498 505  
 RETVEVFL 500 508  
 TVEVFL 500 508  
 RETVEVFLHPDQ 500 512  
 TVEVFLHPDQ 502 512  
 PVLPDQ 506 512  
 PVLPDQ 506 512  
 PVLPDQ 506 513  
 RFQVTF 509 516  
 TVEVFLHPDQVTFGLSPKGVLF 502 526  
 PVLPDQVTFGLSPKGVLF 506 528  
 VTFGLSPKGVLF 513 525  
 VTFGLSPKGVLF 513 528  
 TFGLSPKGVLF 514 525  
 GLSPKGVLF 517 525  
 GLSPKGVLF 517 525  
 SPKGVLF 519 525  
 SPKGVLF 519 526  
 FSKGVLF 520 525  
 FSGPOTKTL 526 536  
 FSGPOTKTL 526 537  
 FSGPOTKTL 526 538  
 VGFPGKRLLA 527 538  
 GPPOTKTL 528 537  
 ARAVTE 538 544  
 ARAVTEVAN 538 548  
 VATEVAN 541 548  
 TEVSANF 543 549  
 FIVGVDEL 549 557  
 SVGVDEL 551 557  
 WGESSENI 561 571  
 GESSENI 563 569  
 WGESSENI 561 573  
 ESNIRDF 566 573  
 WGESSENI 561 585  
 IGFARAAAAPTVP 569 585  
 IGFARAAAAPTVP 572 585  
 DEARAAAAPTVP 574 585

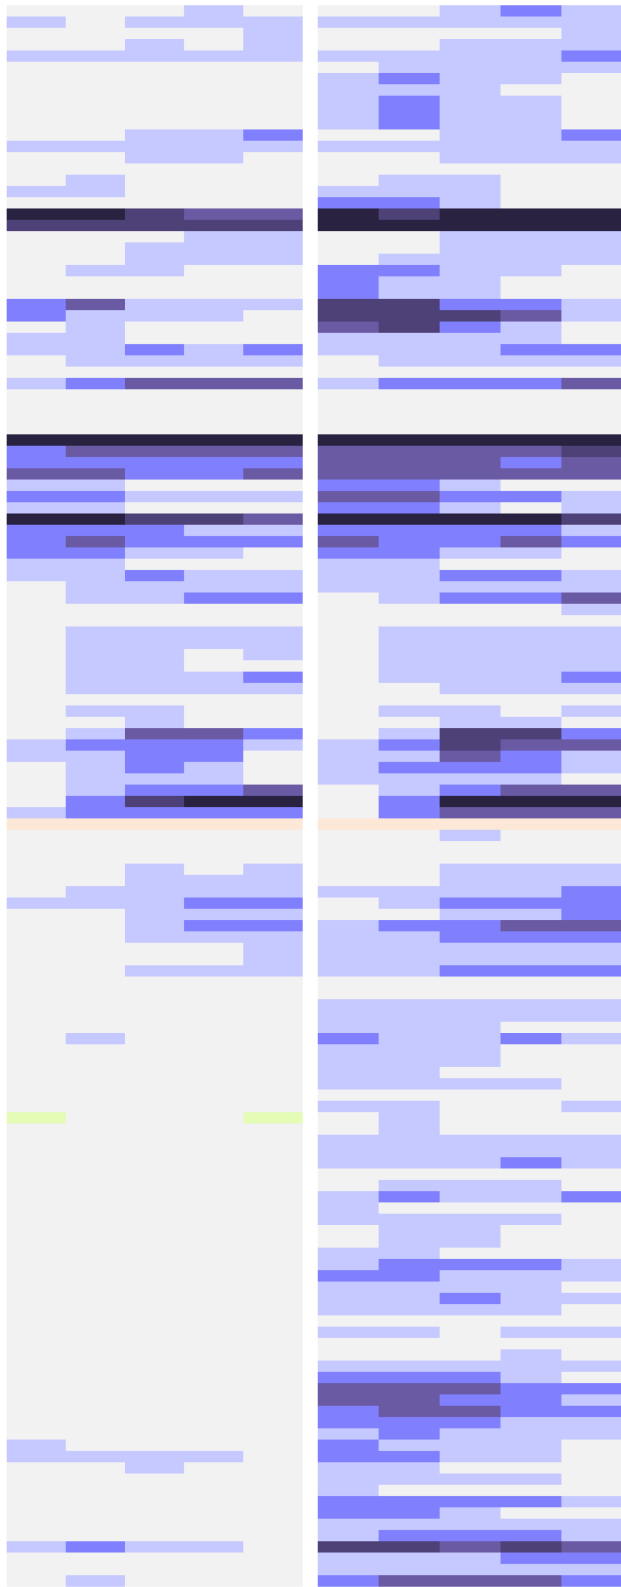

262  
263

(Continued on next page)



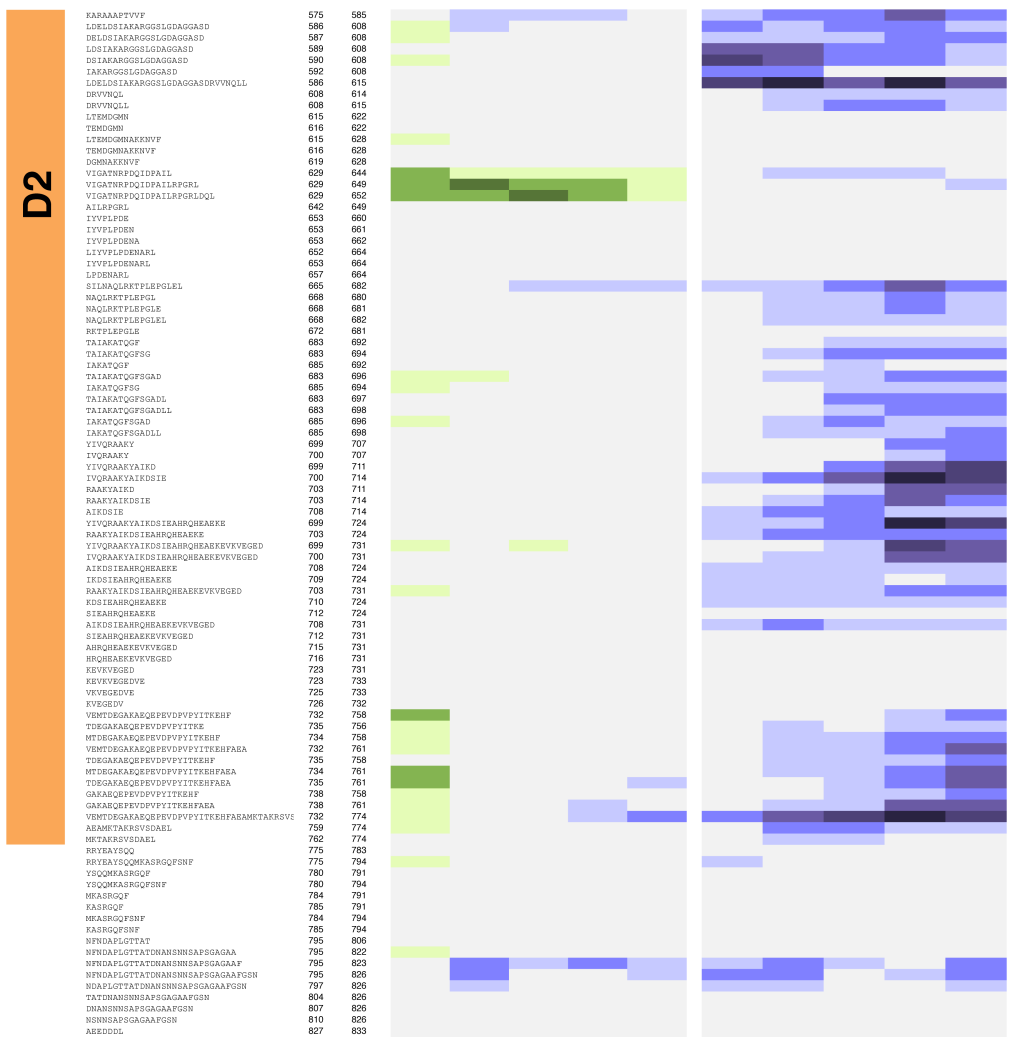

264  
265

266 **Fig. S18. Substrate protection of Cdc48 from HDX.**  
 267 HDX was performed with a substrate-engaged Cdc48/UN complex and with substrate-  
 268 lacking Cdc48/UN complex in the presence of ADP or ADP/BeF<sub>x</sub>. The HDX reaction  
 269 was quenched at different time points, the protein was digested with pepsin and the  
 270 peptides analyzed by MS. Shown is the difference in HDX (with/without substrate) for  
 271 peptides of Cdc48. Shown is the mean of two experiments. The peptides are listed from  
 272 the N- to the C-terminus. The degree of HDX protection by substrate is shown in shades  
 273 of blue (protection) and green (de-protection) (in Daltons, scale on the right). Peptides  
 274 belonging to the N-, D1, or D2 domains are indicated by the bars on the left.

275 **Table S1. Statistics for data collection and refinement**

| <b>Structure</b>                                                | ATP                                | ADP/BeF <sub>x</sub> -1    | ADP/BeF <sub>x</sub> -2 |
|-----------------------------------------------------------------|------------------------------------|----------------------------|-------------------------|
| <b>Data Accession</b>                                           |                                    |                            |                         |
| PDB                                                             | 6OAA9                              | 6OAA                       | 6OAB                    |
| EMDB                                                            | EMD-0665                           | EMD-0666                   | EMD-20000               |
| <b>Data Collection</b>                                          |                                    |                            |                         |
| Microscope                                                      | Titan Krios                        | Talos Arctica              |                         |
| Voltage (kV)                                                    | 300                                | 200                        |                         |
| Exposure navigation                                             | Stage Movement                     | Stage Movement             |                         |
| Automation software                                             | SerialEM                           | SerialEM                   |                         |
| Detector                                                        | Gatan K2 Summit (Super resolution) | Gatan K2 Summit (Counting) |                         |
| Energy filter                                                   | 20 eV                              | N/A                        |                         |
| Pixel Size                                                      | 0.675 Å                            | 1.15 Å                     |                         |
| Exposure time, frames                                           | 10.0 s, 50 frames                  | 8.0 s, 40 frames           |                         |
| Dose rate (e <sup>-</sup> pixel <sup>-1</sup> s <sup>-1</sup> ) | 10.0                               | 7.4                        |                         |
| Electron exposure (e <sup>-</sup> /Å <sup>2</sup> )             | 54.9                               | 44.7                       |                         |
| Defocus range (µm)                                              | -1.0 to -2.5                       | -1.0 to -2.5               |                         |
| Micrographs collected                                           | 3037                               | 2523                       |                         |
| <b>Reconstruction</b>                                           |                                    |                            |                         |
| Software                                                        | Cryosparc2                         | Cryosparc2                 |                         |
| Micrographs used                                                | 2772                               | 1772                       |                         |
| Particles extracted                                             | 1,588,559                          | 1,017,931                  |                         |
| Particles used                                                  | 127,261                            | 30,118                     | 93,395                  |
| Box Size (pixels)                                               | 200                                | 234                        |                         |
| Symmetry                                                        | C1                                 | C1                         |                         |
| Overall resolution (Å)                                          |                                    | 4.1                        | 3.6                     |
| FSC=0.5 (masked/unmasked, Å)                                    | 4.3/7.3                            | 4.9/11.6                   | 3.9/6.8                 |
| FSC=0.143 (masked/unmasked, Å)                                  | 3.9/3.6                            | 4.1/6.6                    | 3.6/4.5                 |
| Map sharpening B-factor (Å <sup>2</sup> )                       | -150                               | -150                       | -100                    |
| Local resolution range (Å)                                      | 3.0 to 9.7                         | 3.0 to 10.0                | 2.5 to 9.0              |
| <b>Model Refinement</b>                                         |                                    |                            |                         |
| Software                                                        | Phenix                             | Phenix                     |                         |
| R.M.S. deviations                                               |                                    |                            |                         |
| Bond length (Å)                                                 | 0.01                               | 0.01                       | 0.01                    |
| Bond angle (°)                                                  | 0.97                               | 1.1                        | 0.85                    |
| Ramachandran statistics (%)                                     |                                    |                            |                         |
| Outliers                                                        | 0.08                               | 0.16                       | 0.08                    |
| Allowed                                                         | 6.38                               | 8.07                       | 7.77                    |
| Favored                                                         | 93.54                              | 91.77                      | 92.15                   |
| MolProbity score                                                | 1.71                               | 1.84                       | 1.75                    |
| All-atom clashscore                                             | 5.31                               | 6.33                       | 5.13                    |
| Poor rotamers (%)                                               | 0.16                               | 0.14                       | 0.24                    |
| B-factors (Protein/Ligand)                                      | 258.49/127.51                      | 112.30/98.51               | 93.22/81.82             |
| Map correlation coefficient                                     | 0.784                              | 0.790                      | 0.754                   |
| Model vs. Map FSC                                               |                                    |                            |                         |
| FSC=0.5 (masked/unmasked, Å)                                    | 4.20/4.21                          | 4.29/4.32                  | 3.91/3.96               |
| FSC=0.143 (masked/unmasked, Å)                                  | 3.86/3.88                          | 4.06/4.10                  | 3.63/3.65               |

276
